# Supplementary material
Source: PubMed Central journal article supplement (PMC9017330)
Supplement: jb.00060-22-s0001.pdf [file jb.00060-22-s0001.pdf]

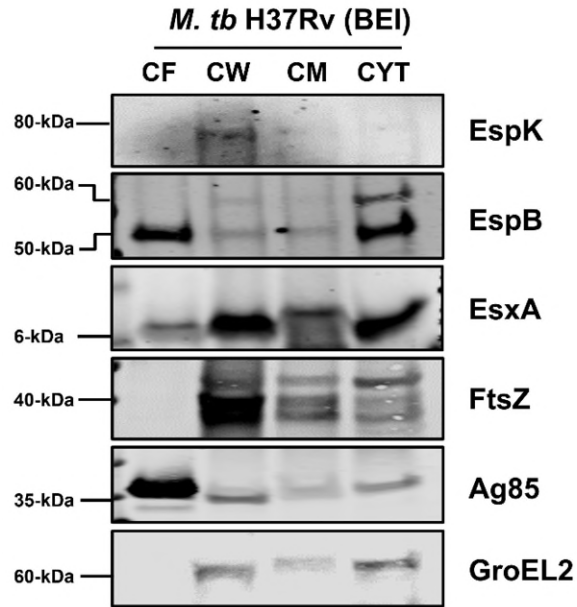

1

2 **Supplementary fig. 1. Cellular localization of EspK in *M. tb* H37Rv.** Immunoblots of  
 3 10 µg/well each of CF, CW, CM and cytosol proteins from *M. tb* H37Rv sourced from BEI  
 4 Resources (ATCC).

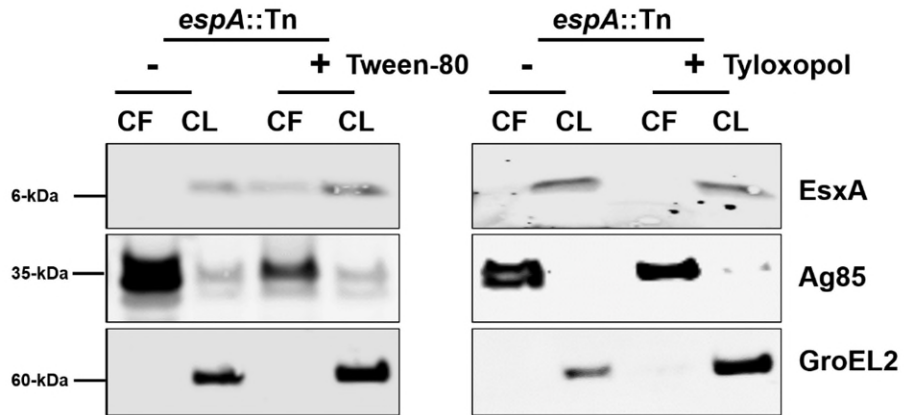

5

6 **Supplementary fig. 2. Secretion and expression of EsxA by *espA::Tn* cultured in**  
 7 **liquid media with and without detergent.** Immunoblot analysis of CF (10 µg/well) and  
 8 CL (5 µg/well) proteins of *espA::Tn* strain cultured for 3 days in Sauton's medium with  
 9 and without Tween-80 (left), and with and without Tyloxapol (right).

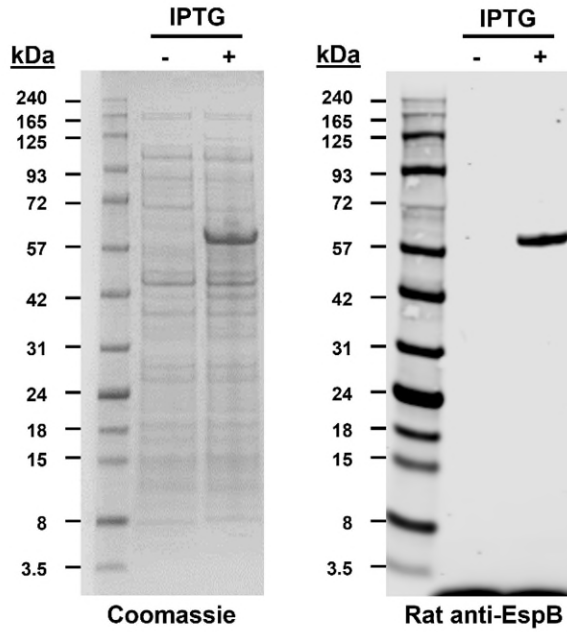

10

11 **Supplementary fig. 3. Specificity of rat anti-EspB antibody.** Coomassie stained SDS-  
12 PAGE gel (left) and immunoblot using rat anti-EspB antibodies generated for this study  
13 (right) of lysates from non-induced and IPTG-induced *E. coli*/His-tag EspB<sup>WT</sup> expressing  
14 full-length EspB.

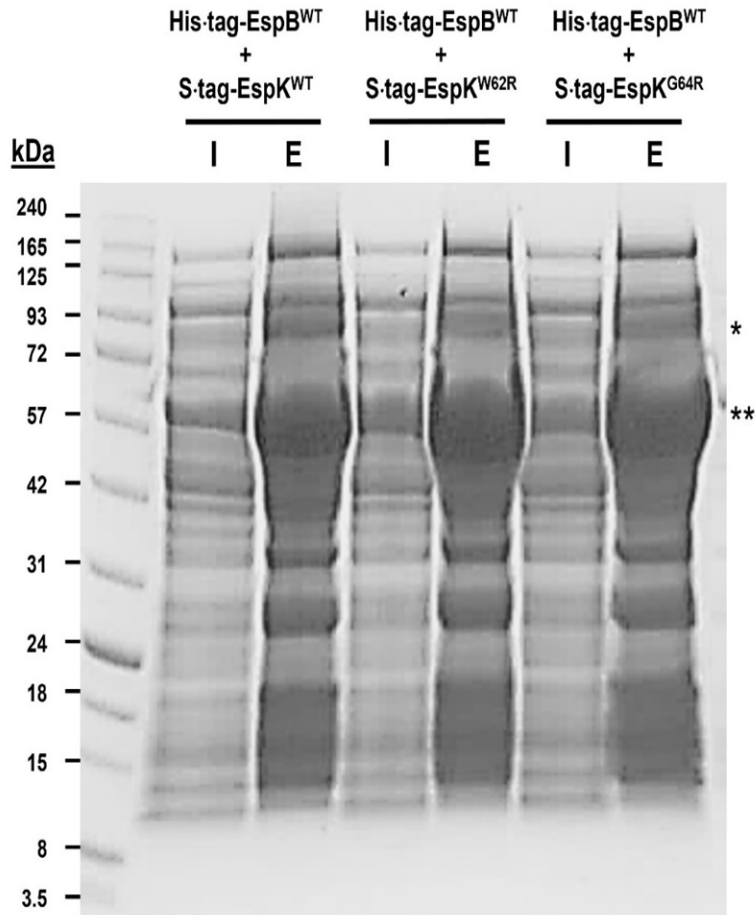

15

16 **Supplementary fig. 4. Coomassie stained SDS-PAGE gel of input lysates and**  
 17 **proteins eluted from his-tag Dynabeads.** SDS-PAGE gel of input lysates (I) at 30  
 18  $\mu\text{g}/\text{well}$  each of *E. coli*/His-tag EspB<sup>WT</sup> + S-tag EspK<sup>WT</sup>, *E. coli*/His-tag EspB<sup>WT</sup> + S-tag  
 19 EspK<sup>W62R</sup> and *E. coli*/His-tag EspB<sup>WT</sup> + S-tag EspK<sup>G64R</sup> and corresponding total captured  
 20 and eluted proteins (E) in 50  $\mu\text{L}$  of SDS-PAGE loading buffer (the single asterisk indicates  
 21 the position of EspK protein band while the double asterisk indicates the position of the  
 22 EspB protein band).



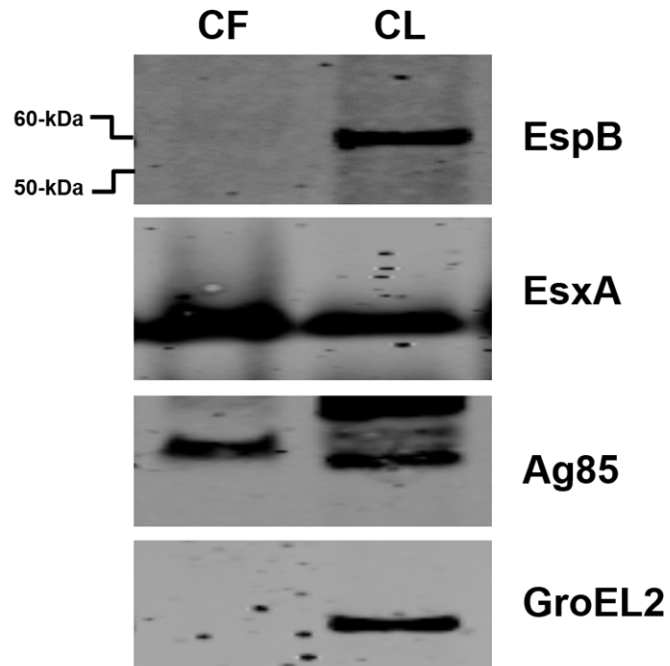

28

29 **Supplementary fig. 6. Secretion and expression of EsxA and EspB by *M. africanum*.**  
30 Immunoblots of CF (10  $\mu$ g/well) and CL (5  $\mu$ g/well) proteins from *M. africanum* NR-49251  
31 (Type-1 strain) cultured for 4 days in Sauton's medium without Tween-80 (representative  
32 of 2 independent experiments).
